# Supplementary material for: ATF2 loss promotes 5-FU resistance in colon cancer cells via activation of the ATR-Chk1 damage response pathway
Source: PubMed Central journal article supplement (PMC10223906; doi:10.1186/s12885-023-10940-0), 2023-05-27
Supplement: 12885_2023_10940_MOESM1_ESM.pdf [file 12885_2023_10940_MOESM1_ESM.pdf]

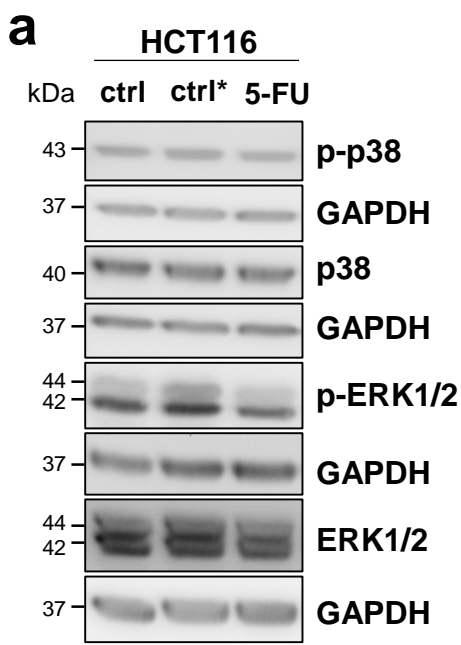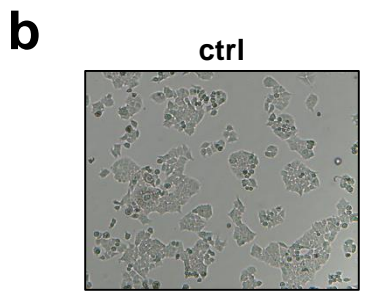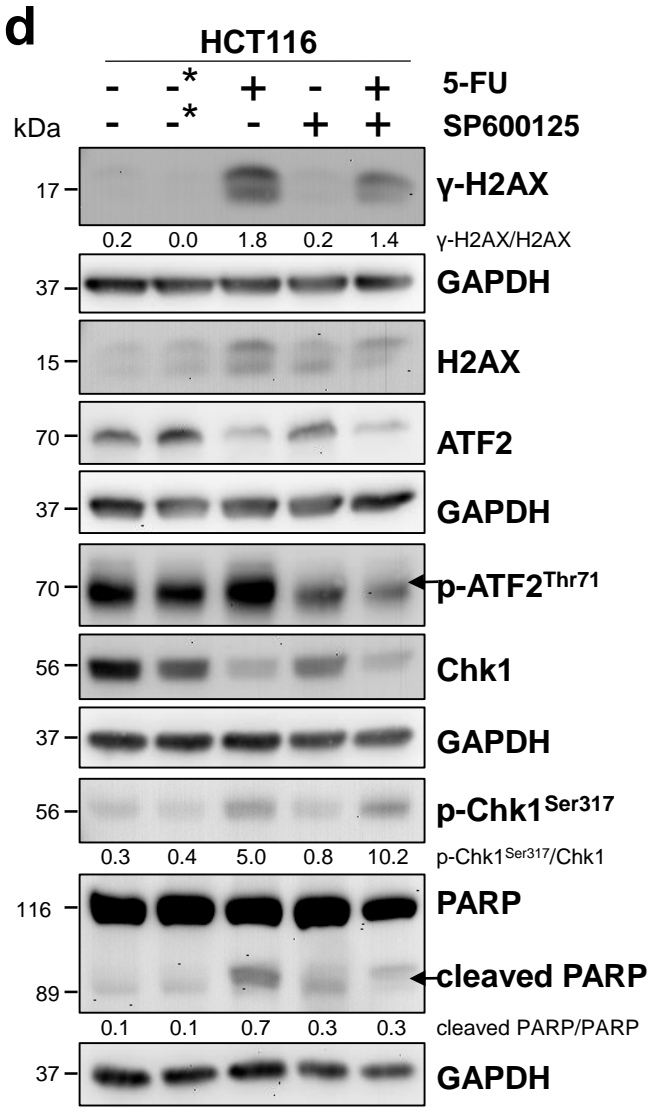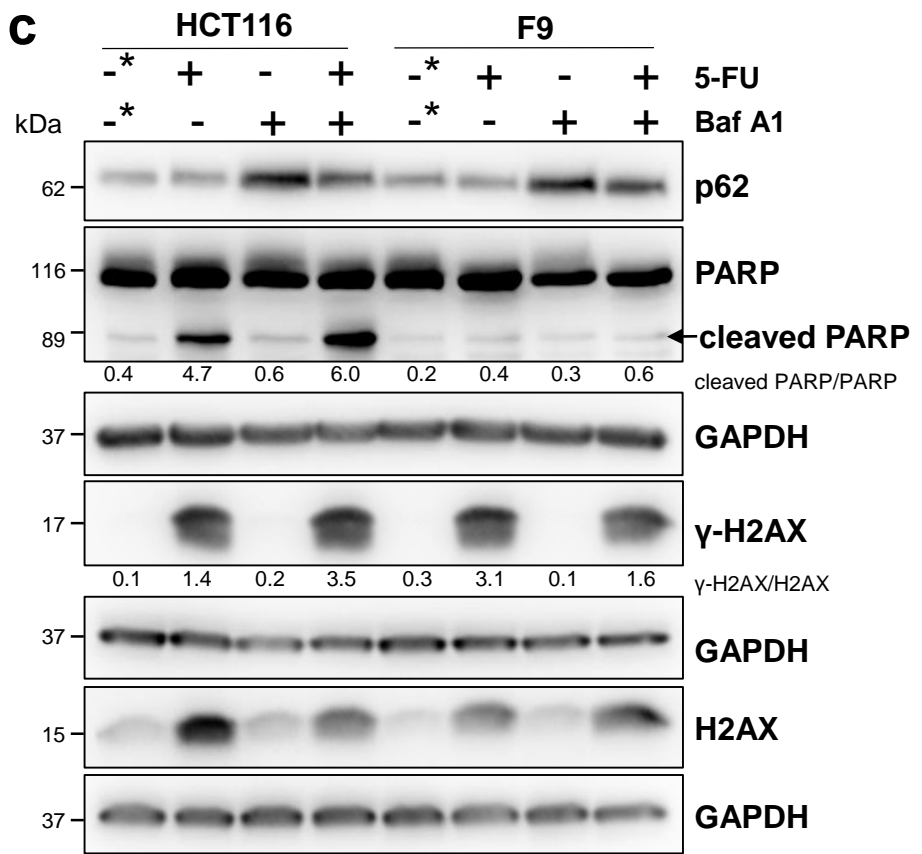

Figure S1
